# Supplementary material
Source: PubMed Central journal article supplement (PMC7807389)
Supplement: jamasurg-e206257-s001.pdf [file jamasurg-e206257-s001.pdf]

## Supplementary Online Content

Best MJ, McFarland EG, Thakkar SC, Srikumaran U. Racial disparities in the use of surgical procedures in the US. *JAMA Surg*. Published online January 13, 2021. doi:10.1001/jamasurg.2020.6257

**eTable 1.** Gender-Adjusted and Population-Adjusted National Incidence of Surgical Procedures by Race in the United States from 2012 to 2017

**eTable 2.** Demographic Data and Characteristics of the Study Population

This supplementary material has been provided by the authors to give readers additional information about their work.

**eTable 1: Gender-adjusted and population-adjusted national incidence of surgical procedures by race in the United States from 2012 to 2017.**

|                        |        | 2012  |       |          |       | 2017  |       |          |       |
|------------------------|--------|-------|-------|----------|-------|-------|-------|----------|-------|
|                        |        | White | Black | Hispanic | Asian | White | Black | Hispanic | Asian |
| Angioplasty            | Total  | 165.8 | 115.1 | 67.0     | 69.8  | 147.9 | 109.2 | 65.9     | 69.6  |
|                        | Male   | 227.1 | 134.5 | 89.2     | 102.6 | 202.8 | 130.3 | 88.7     | 106.1 |
|                        | Female | 105.9 | 97.4  | 44.1     | 40.2  | 94.3  | 89.9  | 42.6     | 36.7  |
| Spinal fusion          | Total  | 149.0 | 92.3  | 47.0     | 35.7  | 147.0 | 101.8 | 51.4     | 34.6  |
|                        | Male   | 139.6 | 87.8  | 45.6     | 32.6  | 141.4 | 97.3  | 50.3     | 33.2  |
|                        | Female | 158.1 | 96.5  | 48.5     | 38.5  | 152.5 | 105.9 | 52.5     | 35.8  |
| CABG                   | Total  | 65.5  | 33.5  | 22.8     | 28.9  | 64.2  | 33.1  | 26.0     | 33.6  |
|                        | Male   | 97.8  | 40.8  | 32.3     | 45.6  | 98.6  | 42.3  | 37.4     | 55.2  |
|                        | Female | 33.9  | 26.9  | 13.1     | 13.9  | 30.6  | 24.7  | 14.4     | 14.1  |
| Carotid endarterectomy | Total  | 32.3  | 9.9   | 6.6      | 5.3   | 34.5  | 16.5  | 9.0      | 8.6   |
|                        | Male   | 38.0  | 10.0  | 7.8      | 7.5   | 40.5  | 16.8  | 10.5     | 10.8  |
|                        | Female | 26.8  | 9.8   | 5.2      | 3.4   | 28.6  | 16.2  | 7.4      | 6.5   |
| THA                    | Total  | 108.4 | 56.6  | 17.9     | 16.8  | 146.3 | 78.2  | 26.4     | 20.3  |
|                        | Male   | 98.4  | 52.9  | 16.5     | 12.5  | 131.7 | 74.6  | 25.0     | 15.1  |
|                        | Female | 118.2 | 60.0  | 19.4     | 20.6  | 160.6 | 81.6  | 27.8     | 25.0  |
| TKA                    | Total  | 231.9 | 135.1 | 65.3     | 47.7  | 272.1 | 159.7 | 83.9     | 67.0  |
|                        | Male   | 184.8 | 79.8  | 47.7     | 30.1  | 220.5 | 95.6  | 60.7     | 45.6  |
|                        | Female | 277.9 | 185.7 | 83.4     | 63.5  | 322.7 | 218.5 | 107.7    | 86.3  |
| Valve replacement      | Total  | 39.4  | 19.5  | 13.5     | 14.9  | 58.1  | 27.4  | 19.4     | 19.7  |
|                        | Male   | 48.3  | 20.3  | 15.0     | 17.7  | 70.0  | 29.6  | 21.6     | 23.7  |
|                        | Female | 30.7  | 18.8  | 11.9     | 12.4  | 46.4  | 25.3  | 17.2     | 16.1  |
| Appendectomy           | Total  | 76.1  | 56.7  | 111.9    | 58.6  | 47.5  | 40.5  | 76.3     | 38.3  |
|                        | Male   | 76.7  | 57.8  | 123.5    | 58.5  | 46.7  | 40.1  | 82.9     | 35.7  |
|                        | Female | 75.5  | 55.8  | 100.0    | 58.8  | 48.3  | 40.8  | 69.5     | 40.7  |
| Colorectal resection   | Total  | 97.3  | 71.1  | 39.4     | 36.5  | 62.7  | 47.4  | 27.7     | 23.3  |
|                        | Male   | 90.6  | 68.7  | 40.1     | 38.0  | 59.0  | 46.0  | 28.9     | 25.5  |
|                        | Female | 103.8 | 73.4  | 38.6     | 35.1  | 66.4  | 48.7  | 26.5     | 21.3  |

CABG=coronary-artery bypass grafting, THA=total hip arthroplasty, TKA=total knee arthroplasty

**eTable 2: Demographic data and characteristics of the study population (patients undergoing major surgical procedures\* in the United States in 2012 and 2017).**

|                     | 2012           | 2017          |
|---------------------|----------------|---------------|
|                     | (N=2,431,914)  | (N=3,057,398) |
|                     | <i>percent</i> |               |
| Age (yrs)           |                |               |
| <50                 | 21.2           | 13.9          |
| 50-64               | 33.5           | 34.1          |
| 65-74               | 26.6           | 31.1          |
| ≥75                 | 18.7           | 20.9          |
| Female              | 52.6           | 49.6          |
| Black race          | 8.1            | 8.3           |
| Hispanic race       | 7.4            | 7.4           |
| Asian race          | 1.6            | 1.8           |
| US Census Division‡ |                |               |
| NE                  | 4.8            | 4.6           |
| MA                  | 13.3           | 13.3          |
| ENC                 | 16.6           | 16.4          |
| WNC                 | 7.7            | 7.6           |
| SA                  | 19.5           | 20.0          |
| ESC                 | 6.9            | 6.9           |
| WSC                 | 10.9           | 11.0          |
| M                   | 7.0            | 7.2           |
| P                   | 13.3           | 12.9          |

\*Major surgical procedures included=percutaneous transluminal coronary angioplasty, spinal fusion, coronary-artery bypass grafting, carotid endarterectomy, total hip arthroplasty, total knee arthroplasty, heart valve replacement, appendectomy, and colorectal resection

‡NE=New England, MA=Mid Atlantic, ENC=East North Central, WNC=West North Central, SA=South Atlantic, ESC=East South Central, WSC=West South Central, MO=Mountain, P=Pacific
